# Supplementary material for: Investigating the Role of 17-Beta Estradiol in the Regulation of the Unfolded Protein Response (UPR) in Pancreatic Beta Cells
Source: MDPI journal article supplement (doi:10.3390/ijms25031816), 2024-02-02
Supplement: s1 [file s1]

# A Females

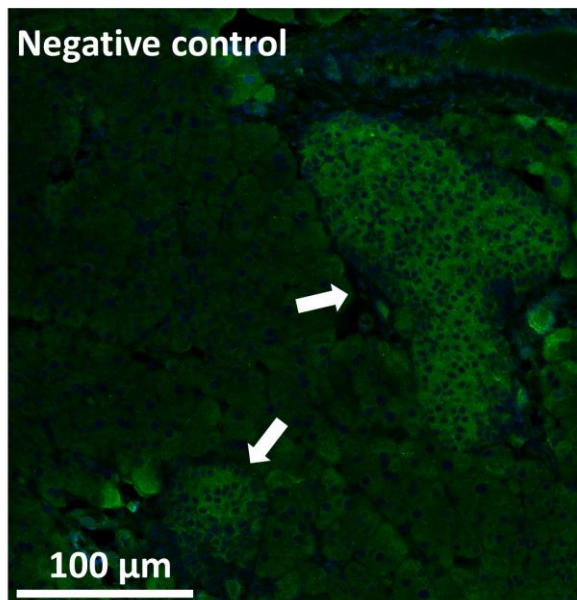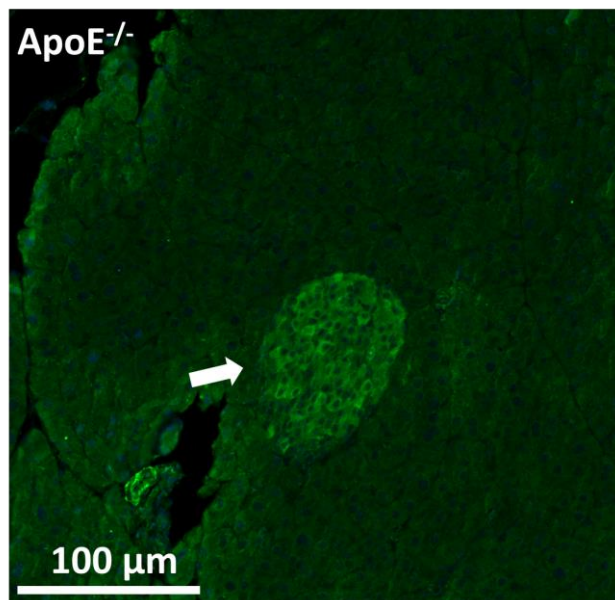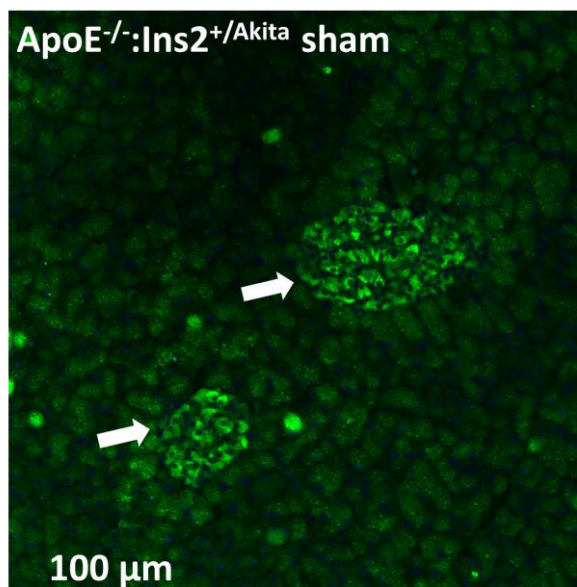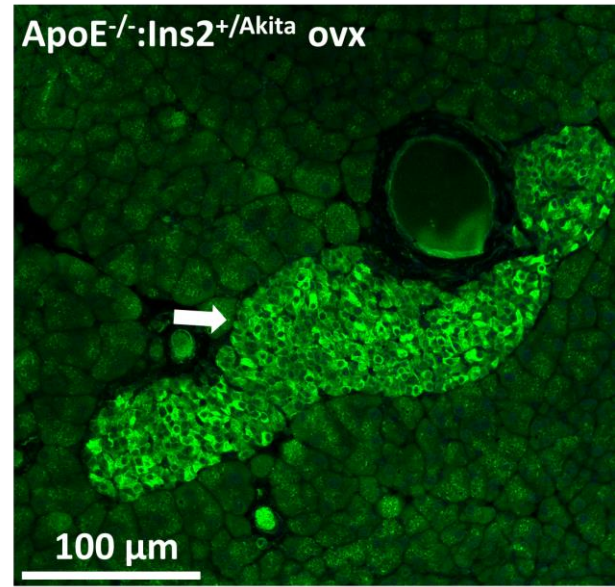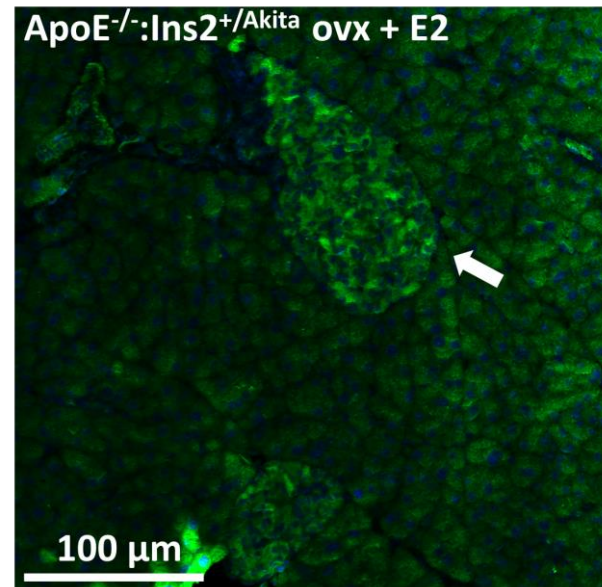

# B

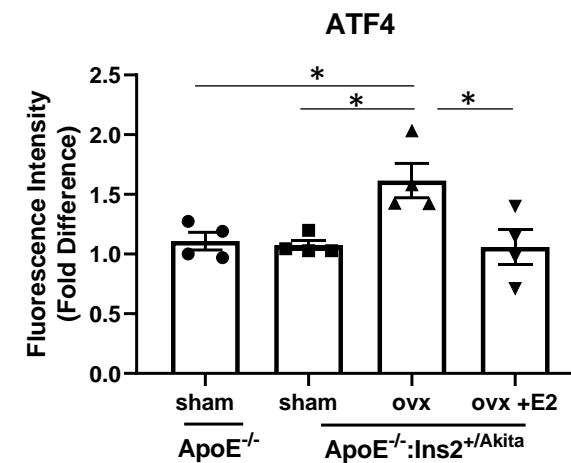

# Males

C

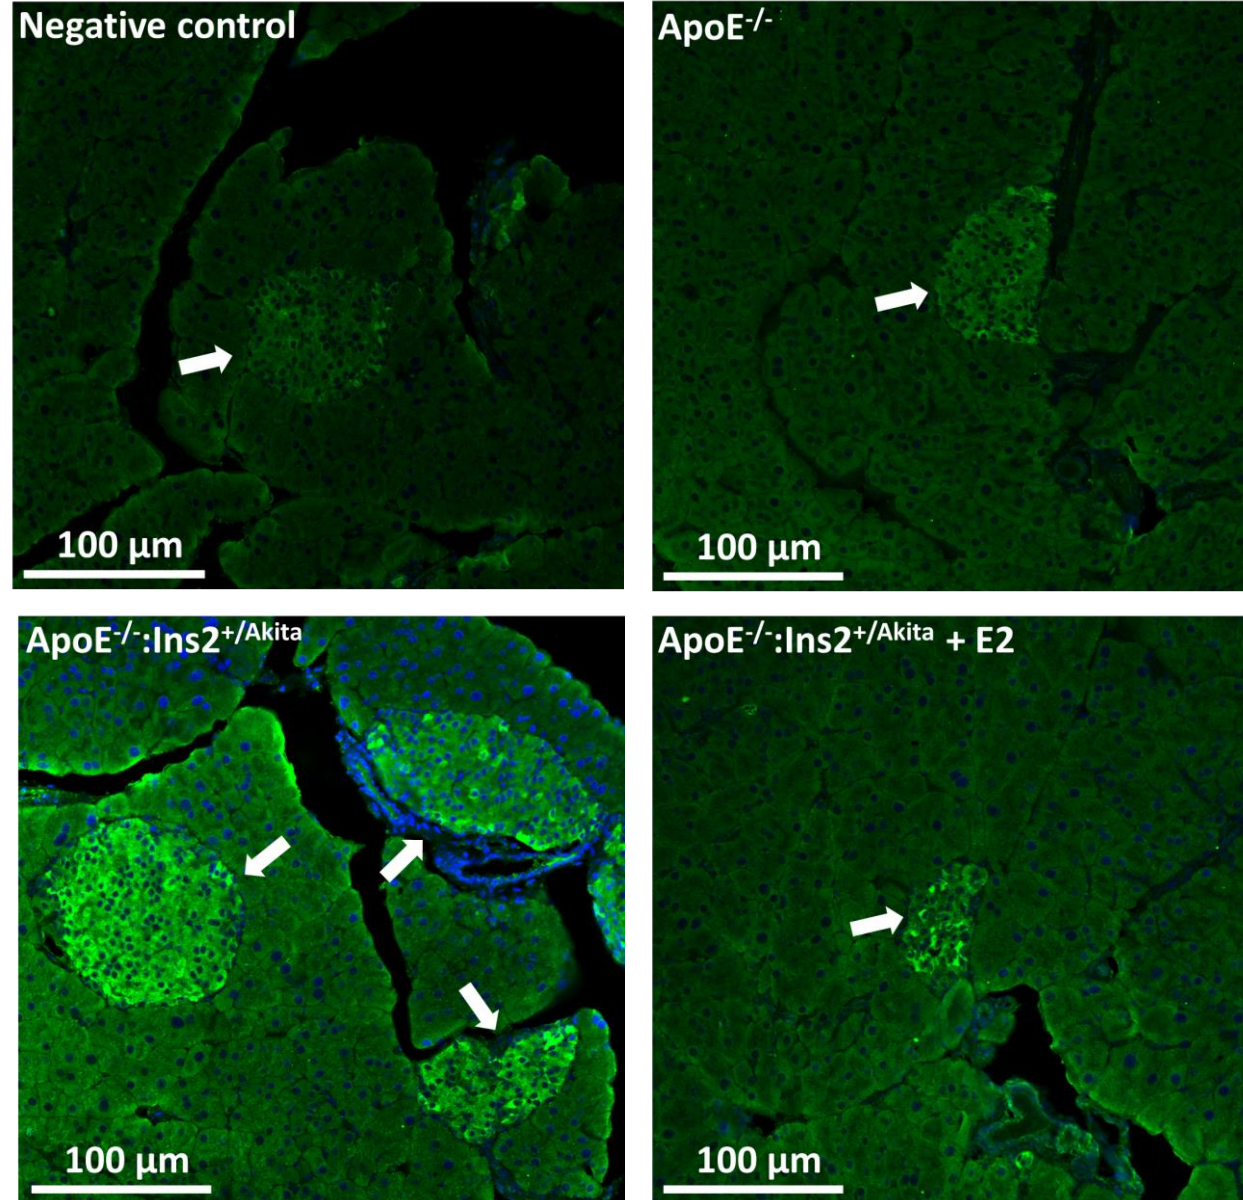

D

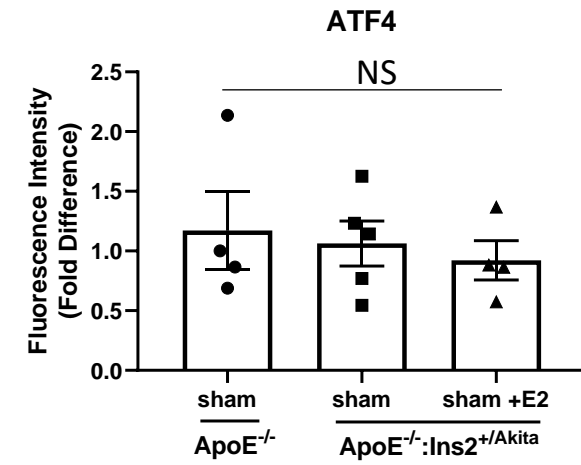

**Supplementary Figure S1. Expression of apoptotic UPR marker ATF4 in pancreatic islets.** Immunofluorescent staining was performed to measure the expression of apoptotic UPR marker ATF4 in pancreatic islet sections of sham-operated, ovariectomized, ovariectomized supplemented with 17-beta estradiol (E2) female **(A, B)** ApoE<sup>-/-</sup>:Ins2<sup>+/-</sup>Akita and female ApoE<sup>-/-</sup> mice; and male **(C, D)** ApoE<sup>-/-</sup>:Ins2<sup>+/-</sup>Akita supplemented with 17-beta estradiol or not, compared to age matched ApoE<sup>-/-</sup> controls. n=4-5 per group. \*p<0.05, NS, not significant. Bars represent standard error of the mean (SEM).

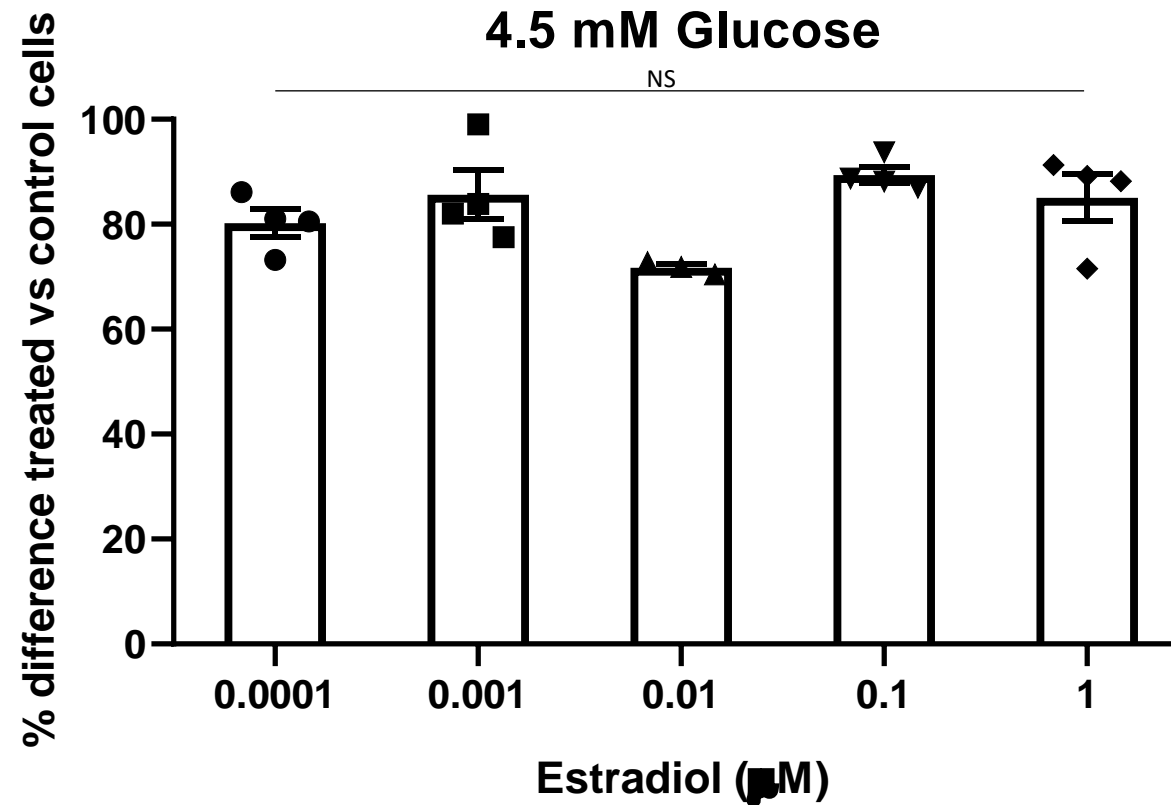

**Supplementary Figure S2. BTC6 cell viability in cells treated with 17-beta estradiol.** BTC6 cells were treated with increasing concentrations of 17-beta estradiol for 24 hours in charcoal-stripped, phenol red-free DMEM containing 10%v/v alamarBlue reagent. Cell viability was calculated with a spectrophotometer after the 24 hour exposure. n=4 per group, analyzed in duplicates. NS, not significant. Bars represent standard error of the mean (SEM).



**A**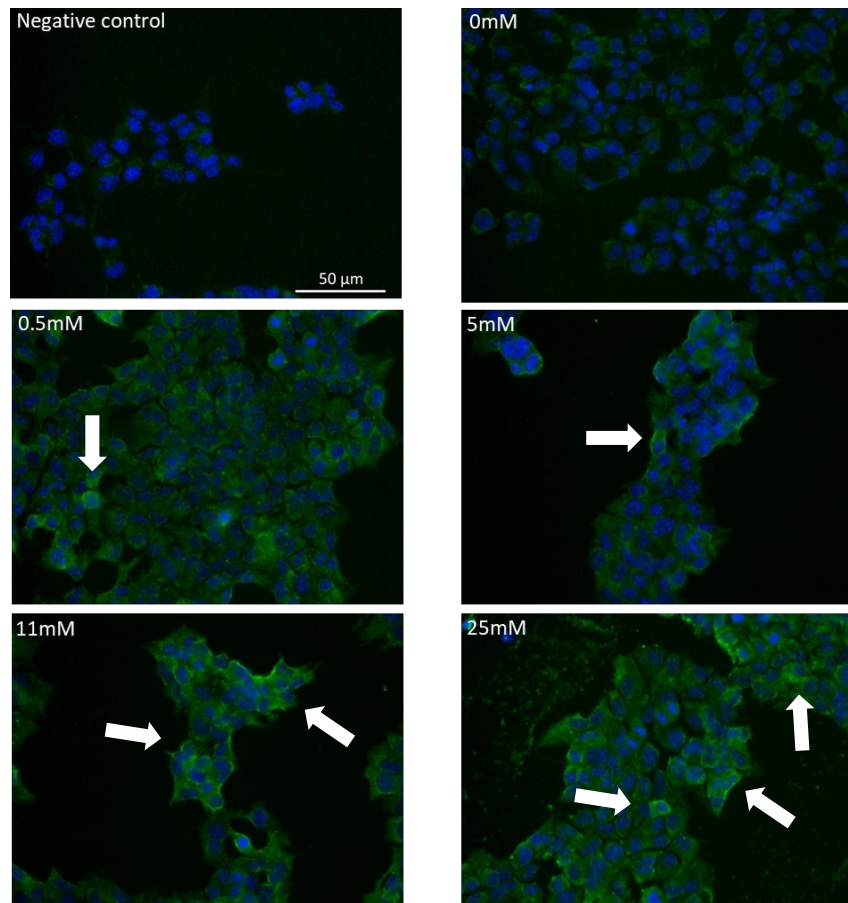**B**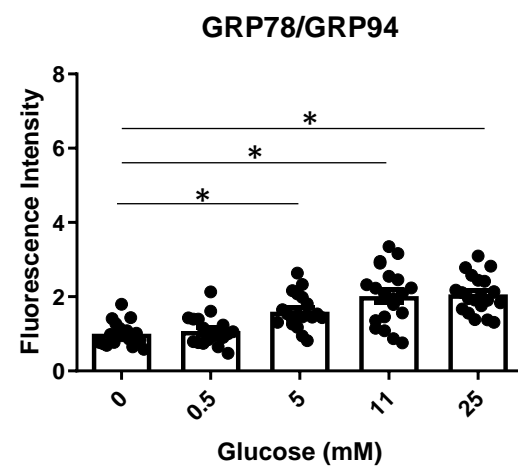**C**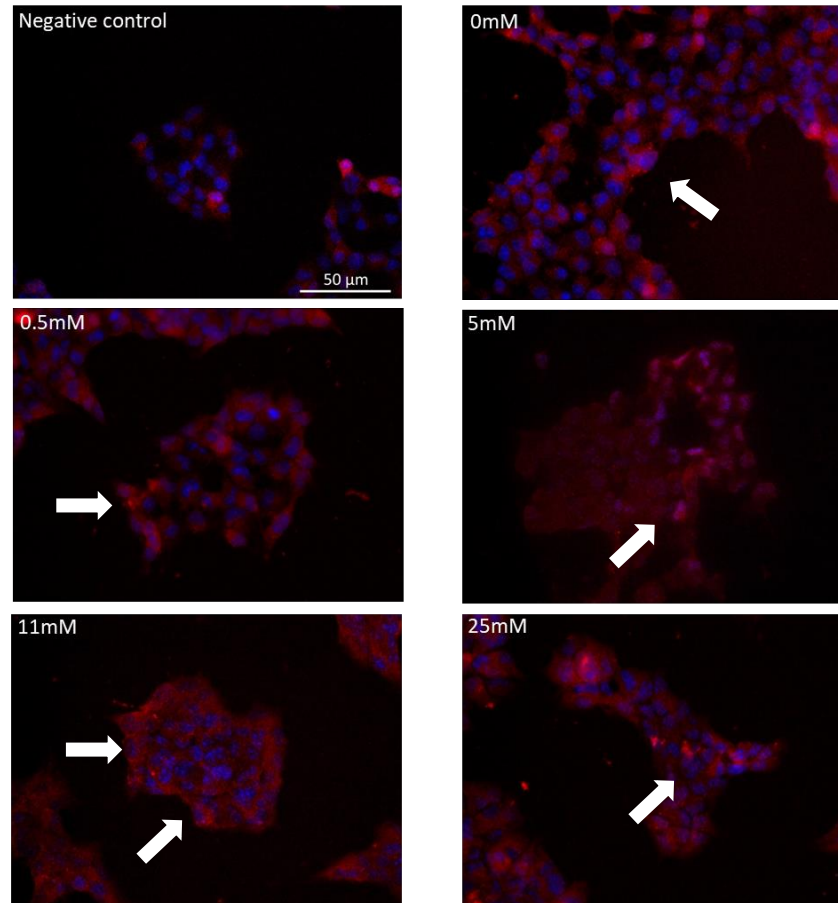**D**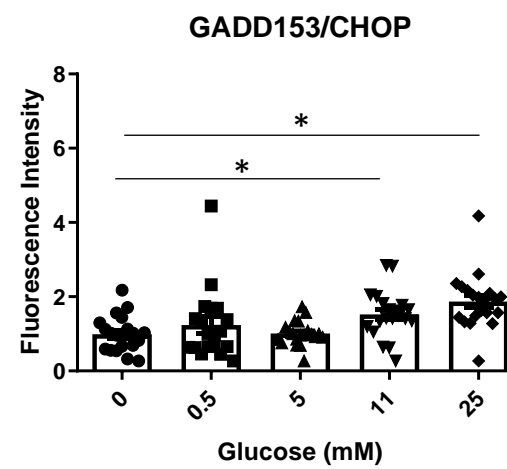

**Supplementary Figure S3. UPR activation in BTC6 cells exposed to increasing glucose concentrations.** BTC6 cells were exposed for two hours to Krebs-Ringer HEPES buffer containing increasing concentrations of glucose (0-25 mM). Immunofluorescence was determined by assessing fluorescence intensity of cells using an antibody against GRP78/GRP94 (monoclonal mouse KDEL antibody, ADI-SPA-827-J, Enzo/Cedarlane, Burlington, ON, Canada), 1:150 dilution, or an antibody against GADD153/CHOP (monoclonal mouse GADD153 (B3) sc-7531, Santa Cruz Biotechnology, Dallas, TX, USA), 1:50 dilution, and counterstained with DAPI (Invitrogen, Carlsbad, CA) at a dilution of 1:5,000. Immunostaining was detected using secondary antibodies Alexa Fluor 488 goat anti-mouse IgG (A11001, Thermo Scientific, Middletown, VA) and Alexa Fluor 568 goat anti-mouse IgG (A11004, Thermo Scientific, Middletown, VA) each at 1:200 dilution. Separate cells were stained with preimmune IgG instead of the primary antibody, to control for nonspecific staining. n = 20 cells per experimental group were selected. Images were captured using an Olympus DP72 digital camera (Olympus) mounted onto an Olympus BX41 microscope (Olympus). The intensity of fluorescence staining for each experimental group was calculated as follows: corrected total cell fluorescence = Integrated density – (area of cell x mean fluorescence of background readings).

**A****4 hrs**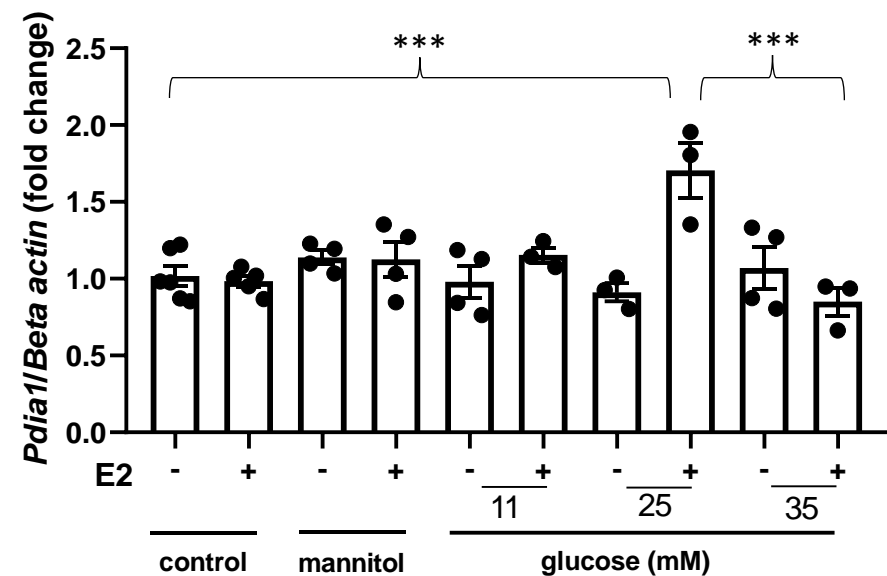***Pdia1***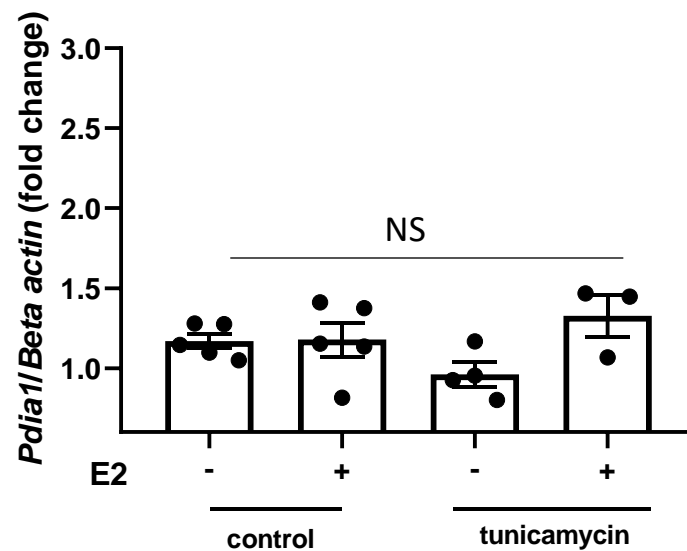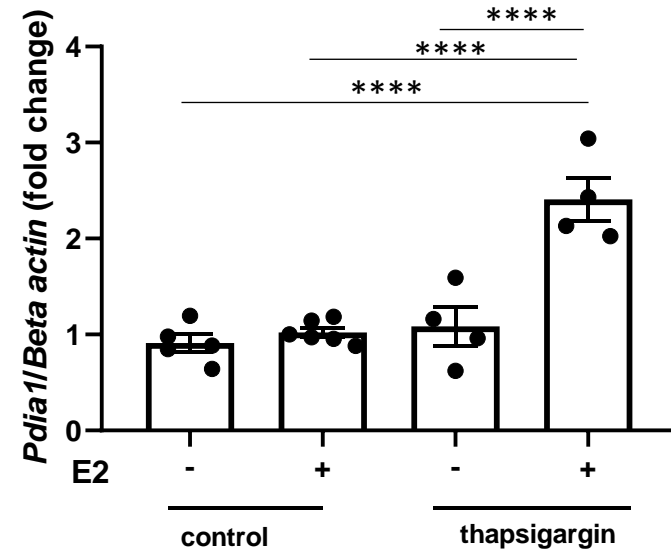**B****8 hrs**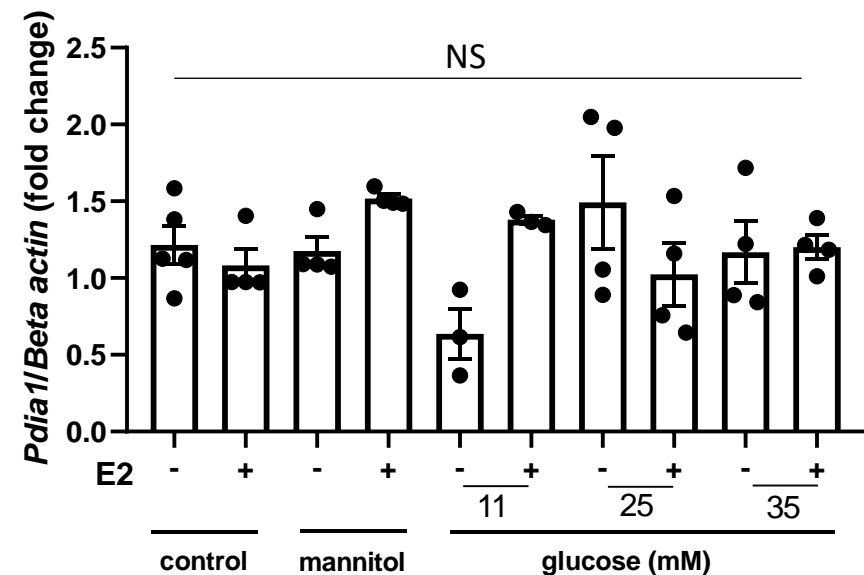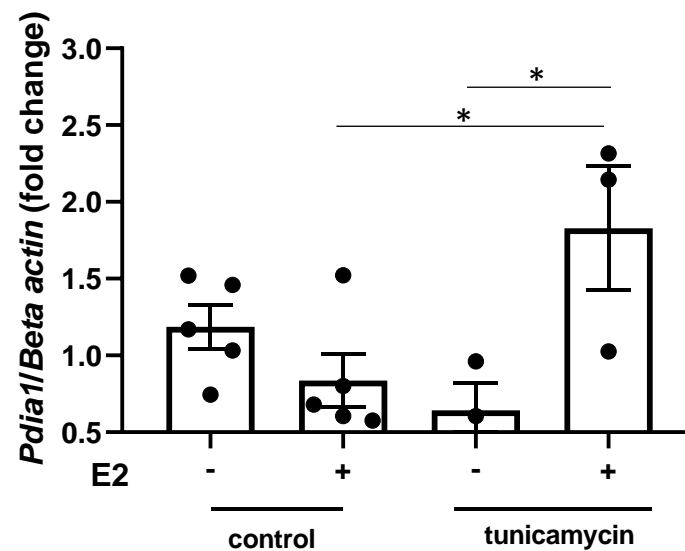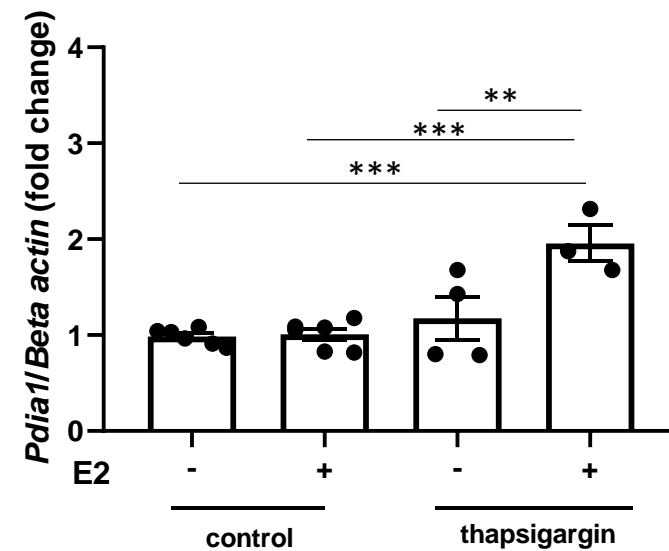

**Supplementary Figure S4. Expression of *Pdia1* in BTC6 cells pretreated with estrogen.** Transcripts from BTC6 cells pretreated (or not) with 17-beta estradiol (E2) were analysed for the expression of the adaptive UPR marker *Pdia1* after **(A)** 4 hours or **(B)** 8 hours of exposure to glucose (11 mM, 25 mM, 35 mM), tunicamycin (0.125 µg/ml), thapsigargin (0.25 µM). Mannitol (30 mM) was used as osmotic control. n=3-5 samples per experimental group, analyzed in duplicates. \*p<0.05, \*\*p<0.01, \*\*\*p<0.001, \*\*\*\*p<0.0001, NS, not significant. Bars represent standard error of the mean (SEM).



***Pdia3***

**A**

# 4 hrs

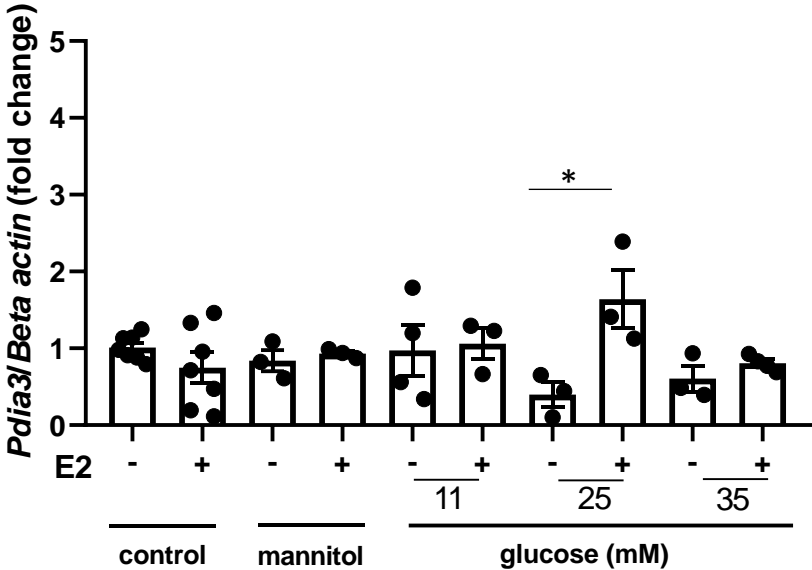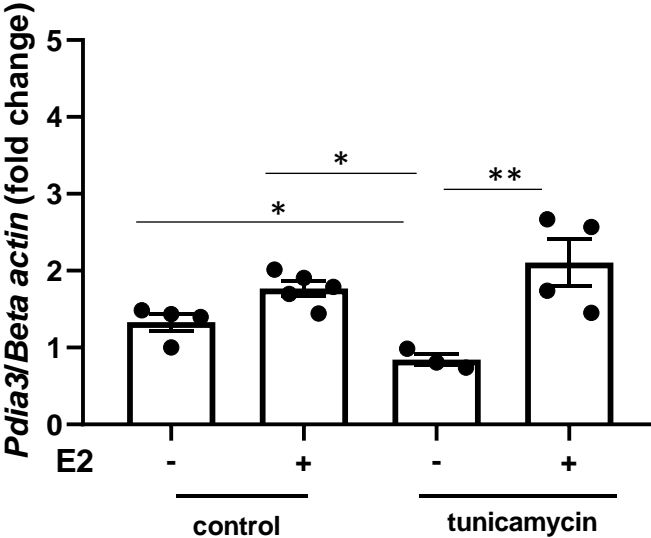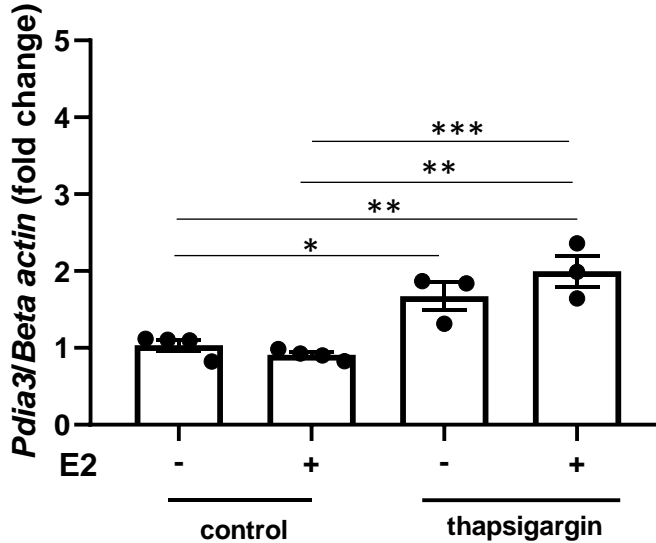

# B

# 8 hrs

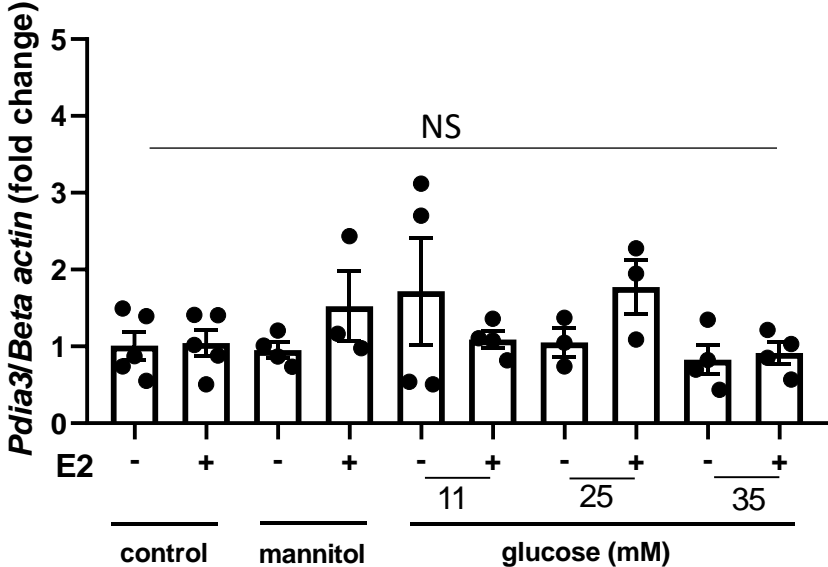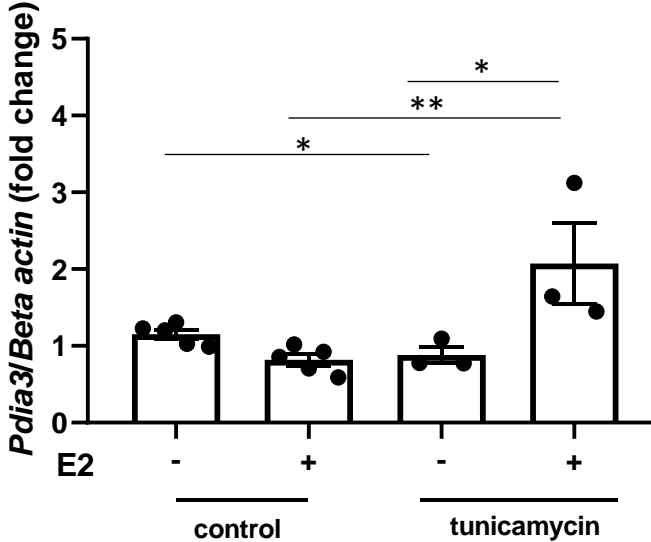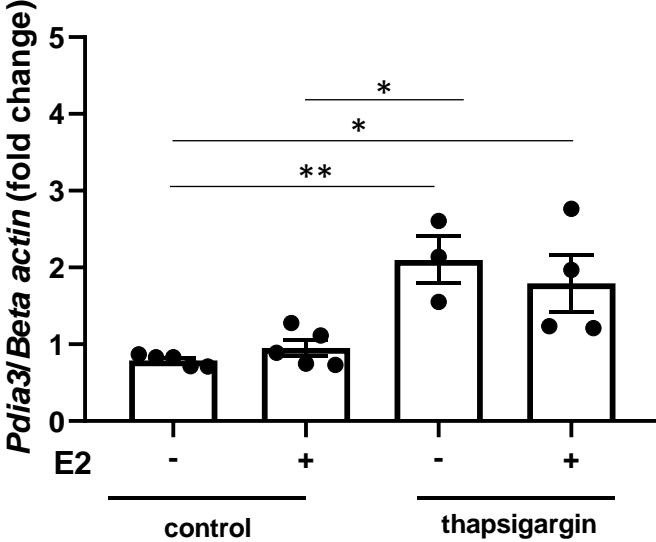

**Supplementary Figure S5. Expression of *Pdia3* in BTC6 cells pretreated with estrogen.** Transcripts from BTC6 cells pretreated (or not) with 17-beta estradiol (E2) were analysed for the expression of the adaptive UPR marker *Pdia3* after **(A)** 4 hours or **(B)** 8 hours of exposure to glucose (11 mM, 25 mM, 35 mM), tunicamycin (0.125 µg/ml), thapsigargin (0.25 µM). Mannitol (30 mM) was used as osmotic control. n=3-5 samples per experimental group, analyzed in duplicates. \*p<0.05, \*\*p<0.01, \*\*\*p<0.001, NS, not significant. Bars represent standard error of the mean (SEM).

**A****4 hrs**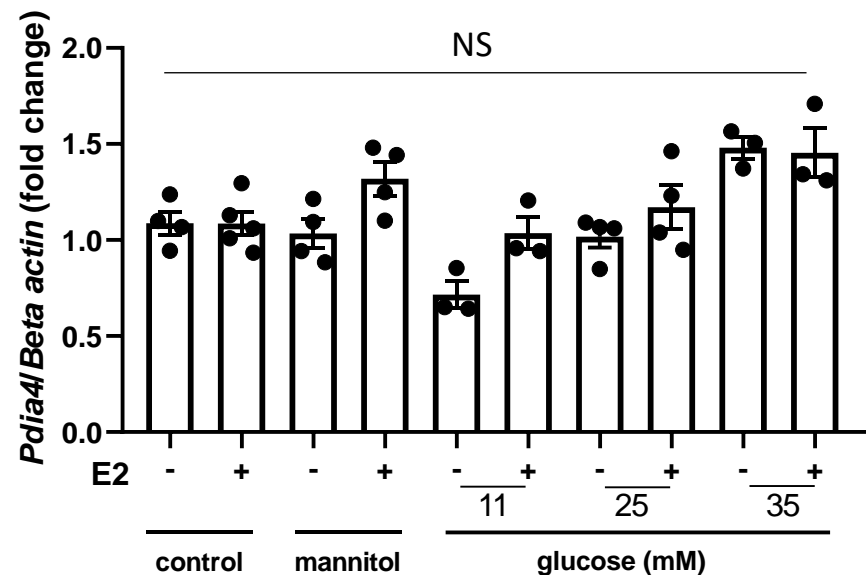***Pdia4***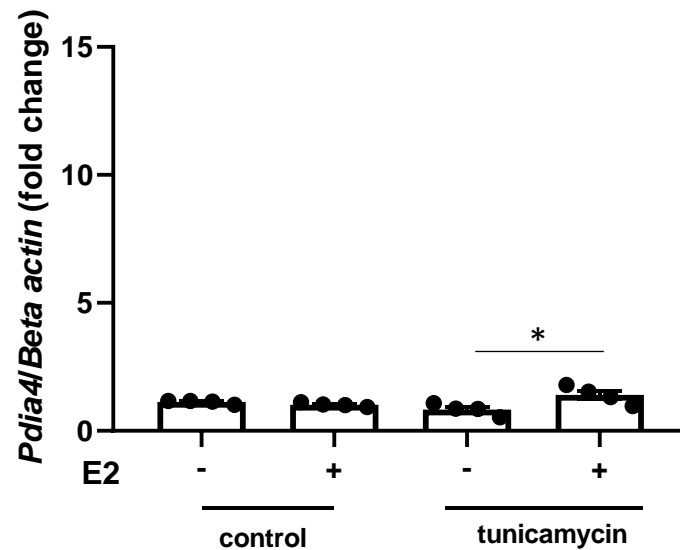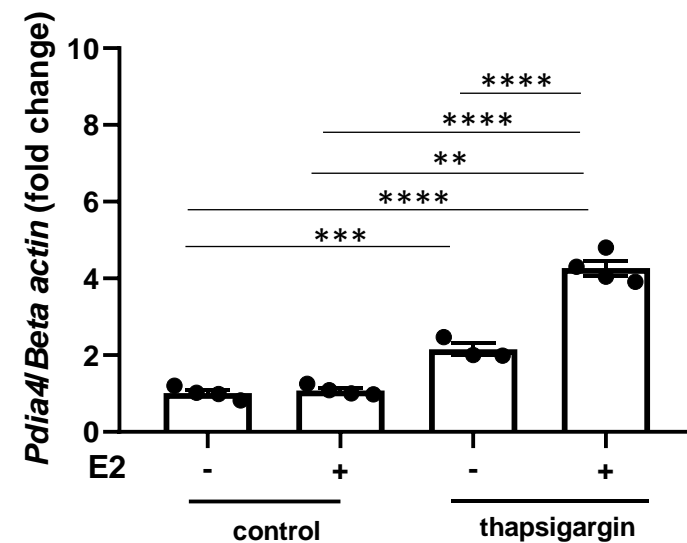**B****8 hrs**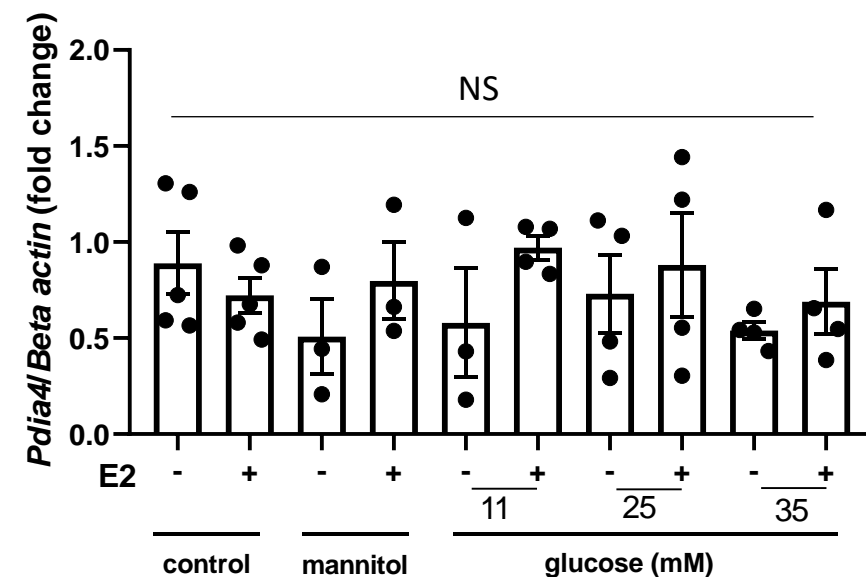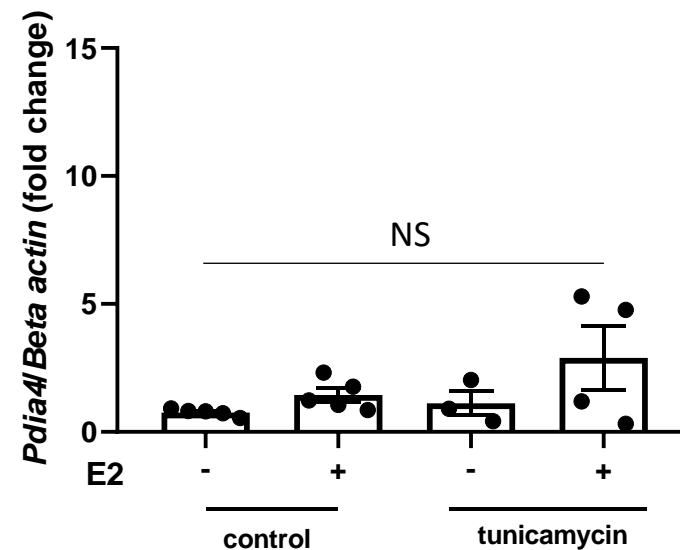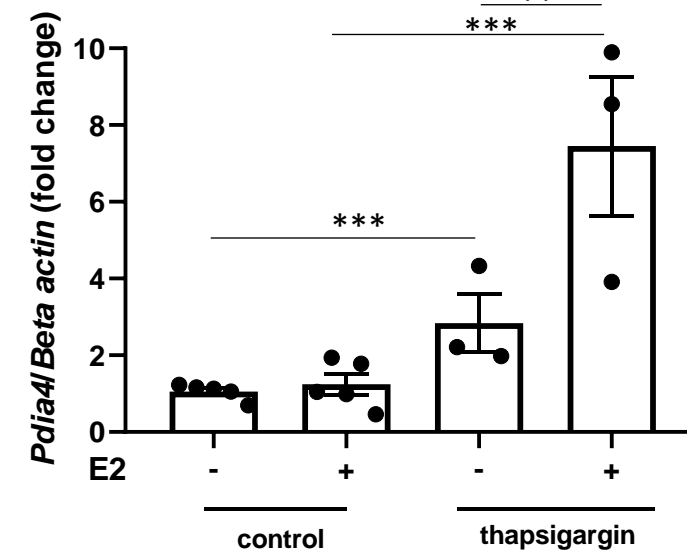

**Supplementary Figure S6. Expression of *Pdia4* in BTC6 cells pretreated with.** Transcripts from BTC6 cells pretreated (or not) with 17-beta estradiol (E2) were analysed for the expression of the adaptive UPR marker *Pdia4* after **(A)** 4 hours or **(B)** 8 hours of exposure to glucose (11 mM, 25 mM, 35 mM), tunicamycin (0.125 µg/ml), thapsigargin (0.25 µM). Mannitol (30 mM) was used as osmotic control. n=3-5 samples per experimental group, analyzed in duplicates. \*p<0.05, \*\*p<0.01, \*\*\*p<0.001, \*\*\*\*p<0.0001, NS, not significant. Bars represent standard error of the mean (SEM).

**A****4 hrs**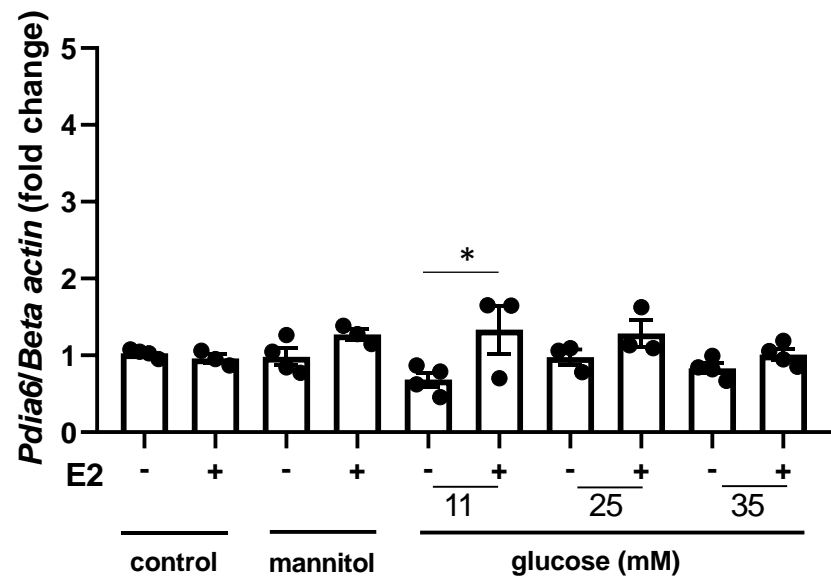***Pdia6***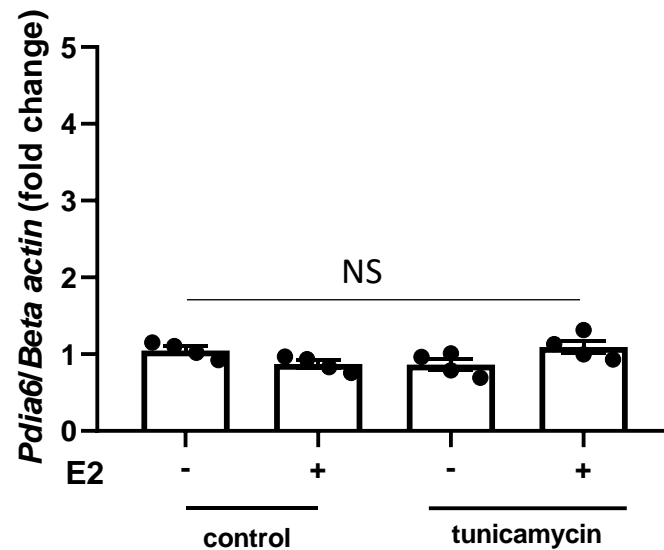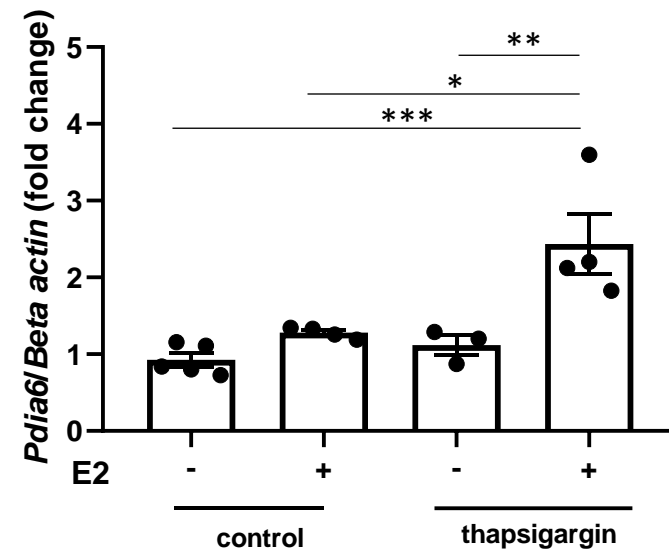**B****8 hrs**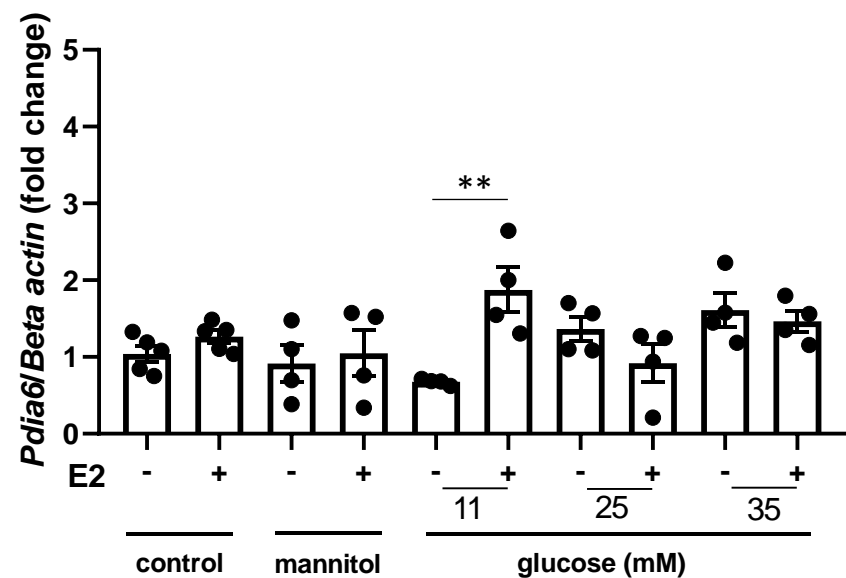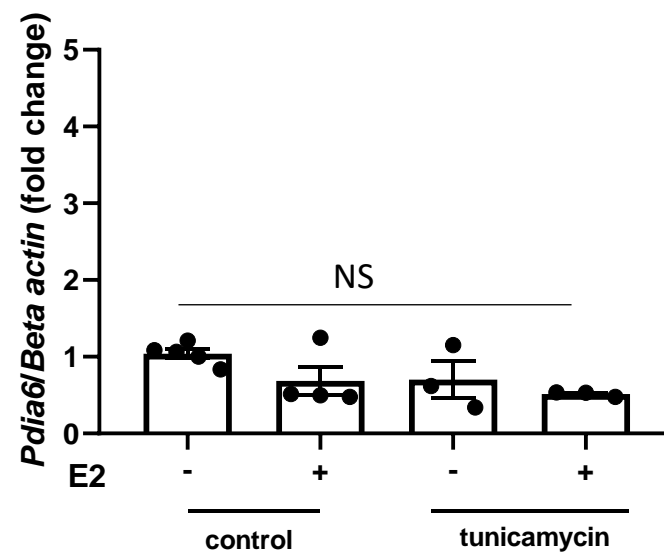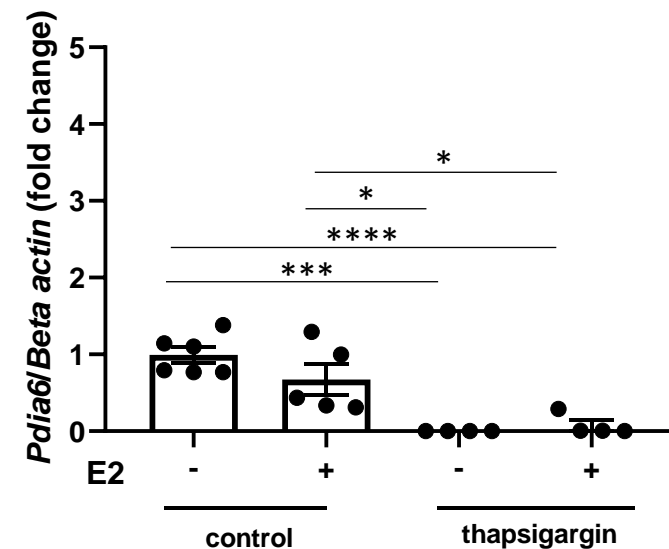



**Supplementary Figure S7. Expression of *Pdia6* in BTC6 cells pretreated with estrogen.** Transcripts from BTC6 cells pretreated (or not) with 17-beta estradiol (E2) were analysed for the expression of the adaptive UPR marker *Pdia6* after **(A)** 4 hours or **(B)** 8 hours of exposure to glucose (11 mM, 25 mM, 35 mM), tunicamycin (0.125 µg/ml), thapsigargin (0.25 µM). Mannitol (30 mM) was used as osmotic control. n=3-5 samples per experimental group, analyzed in duplicates. \*p<0.05, \*\*p<0.01, \*\*\*p<0.001, \*\*\*\*p<0.0001, NS, not significant. Bars represent standard error of the mean (SEM).

**A****4 hrs**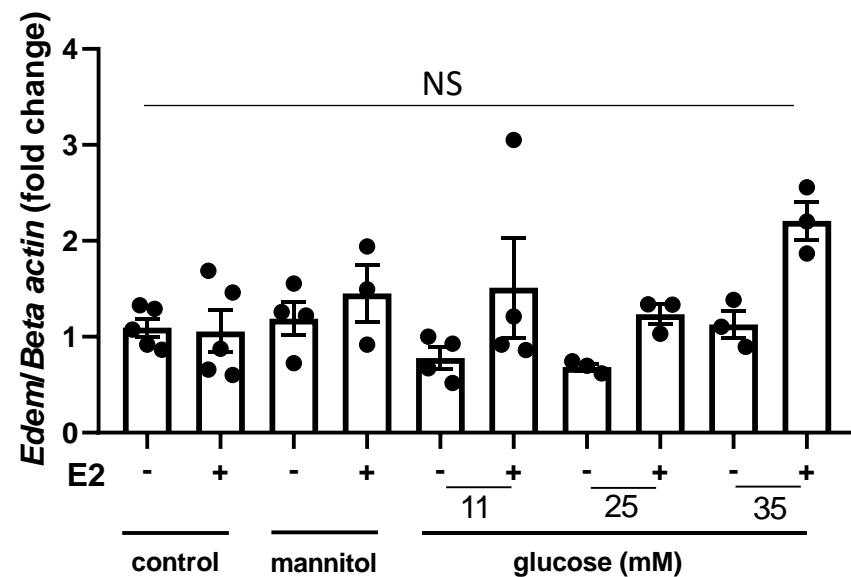***Edem***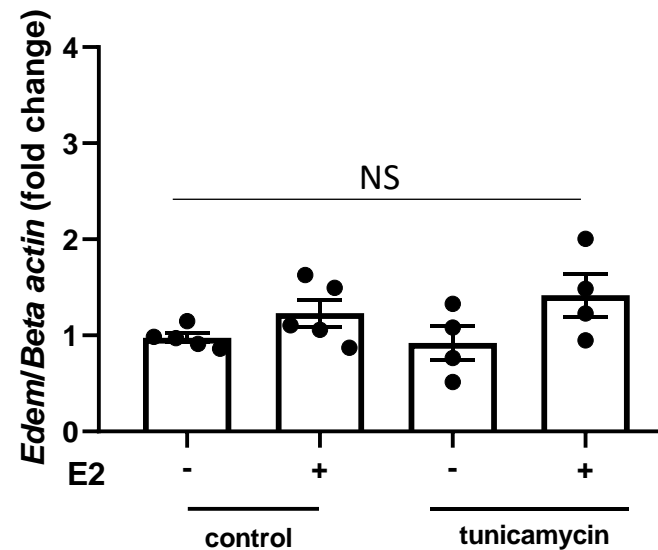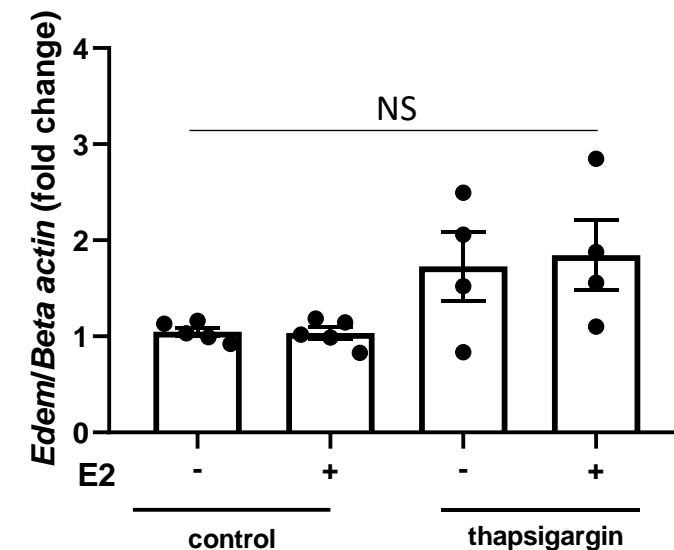**B****8 hrs**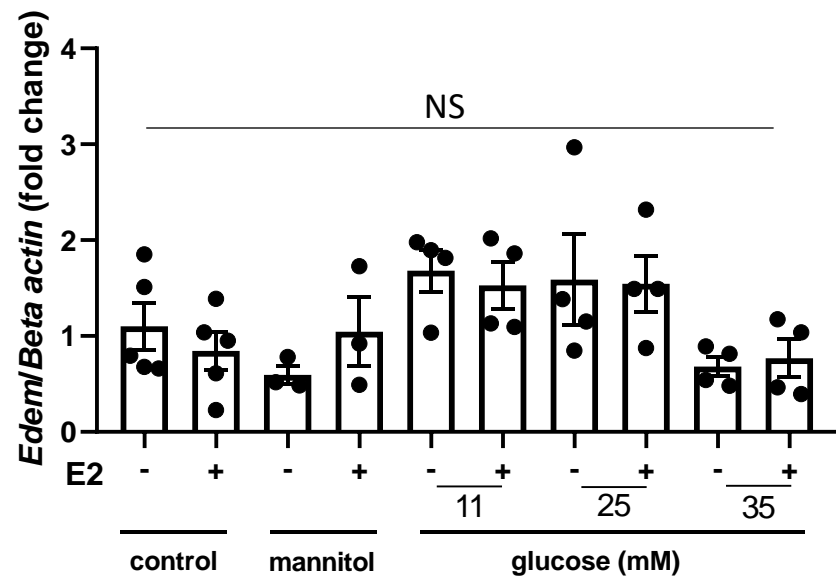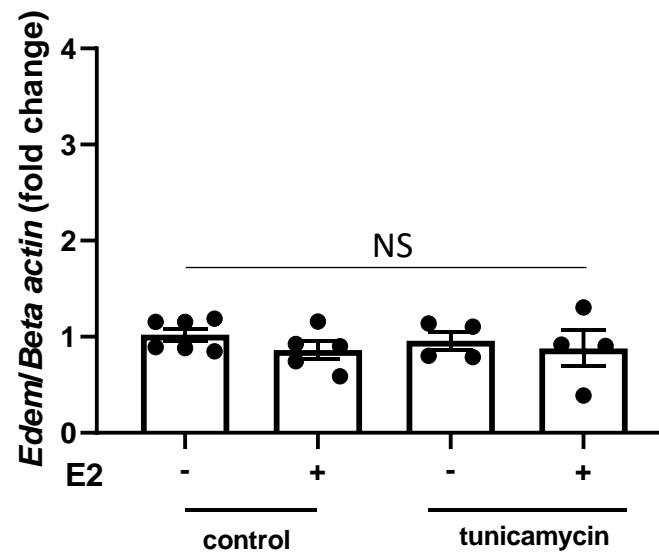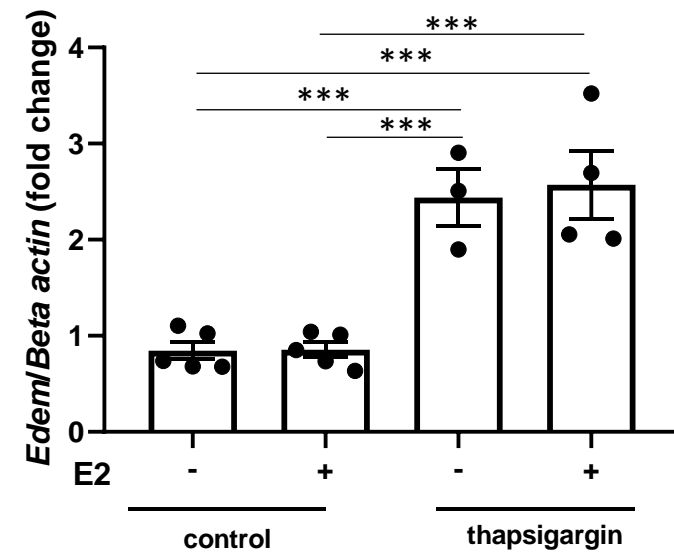

**Supplementary Figure S8. Expression of *Edem* in BTC6 cells pretreated with estrogen.** Transcripts from BTC6 cells pretreated (or not) with 17-beta estradiol (E2) were analysed for the expression of the adaptive UPR marker *Edem* after **(A)** 4 hours or **(B)** 8 hours of exposure to glucose (11 mM, 25 mM, 35 mM), tunicamycin (0.125 µg/ml), thapsigargin (0.25 µM). Mannitol (30 mM) was used as osmotic control. n=3-5 samples per experimental group, analyzed in duplicates. \*\*\*p<0.001, NS, not significant. Bars represent standard error of the mean (SEM).

A

4 hrs

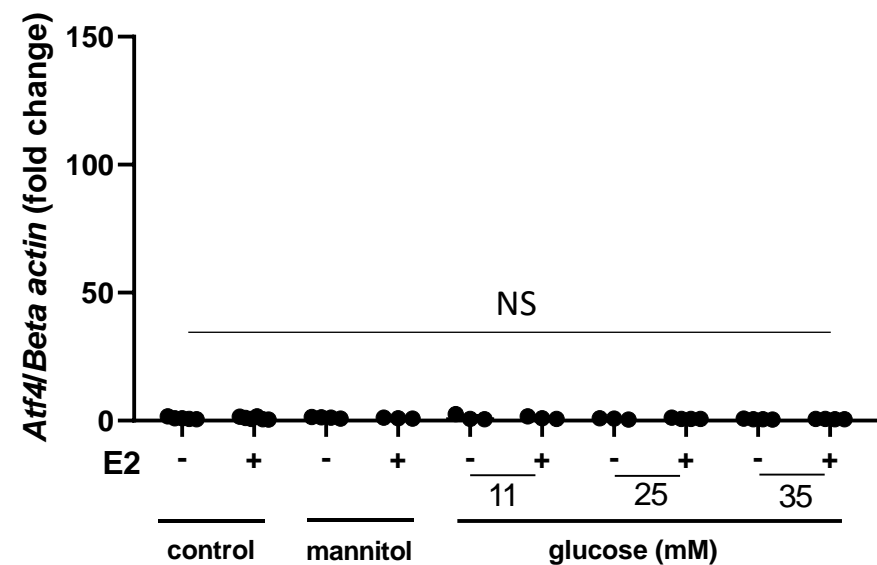*Atf4*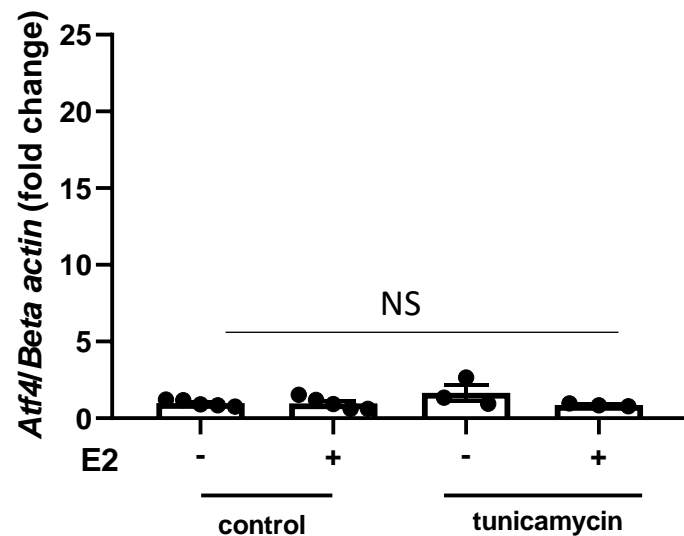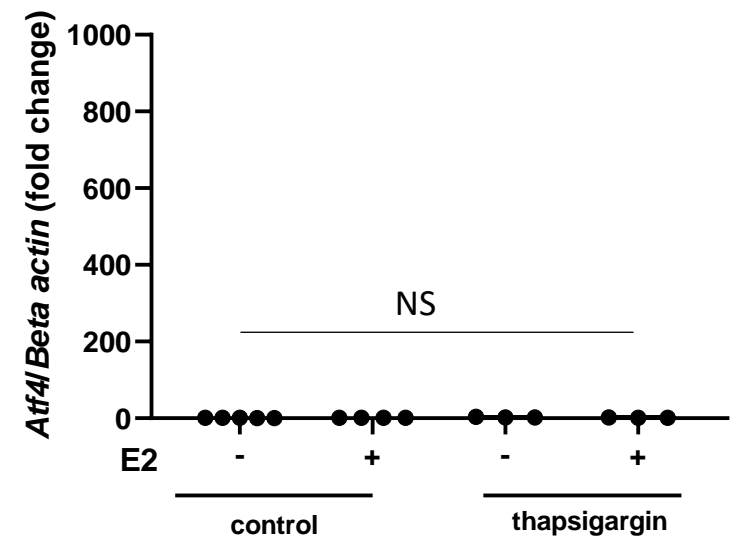

B

8 hrs

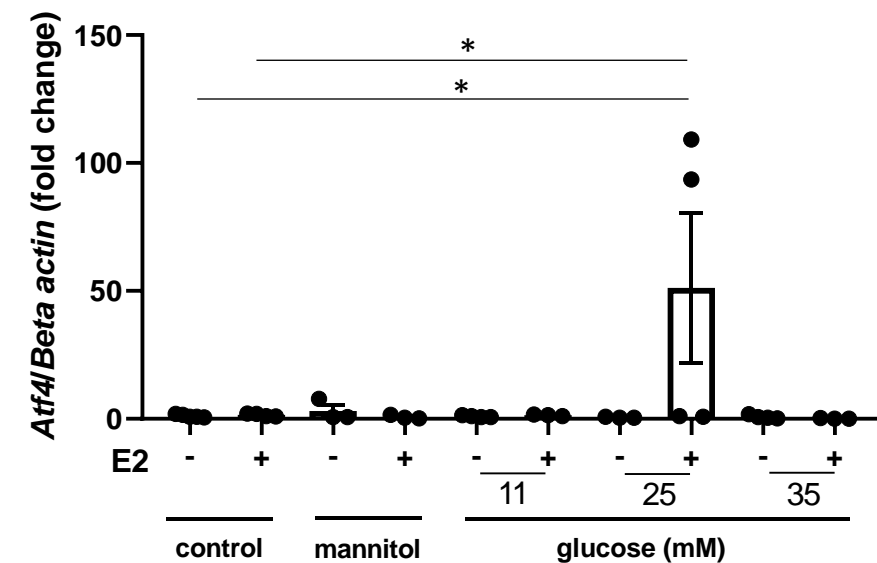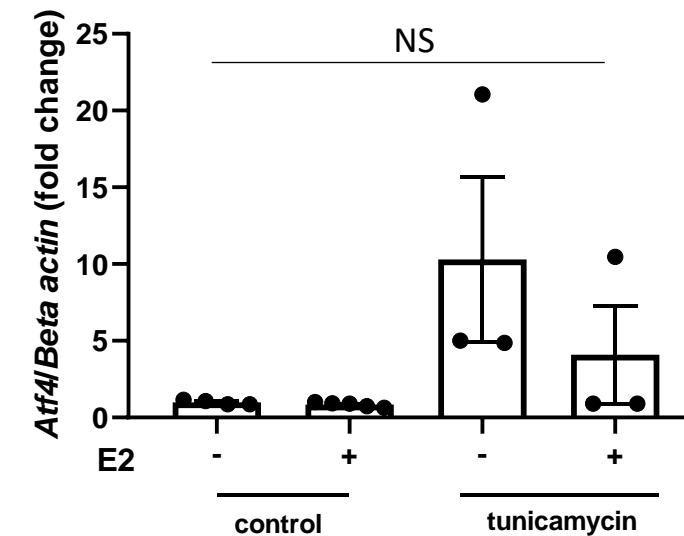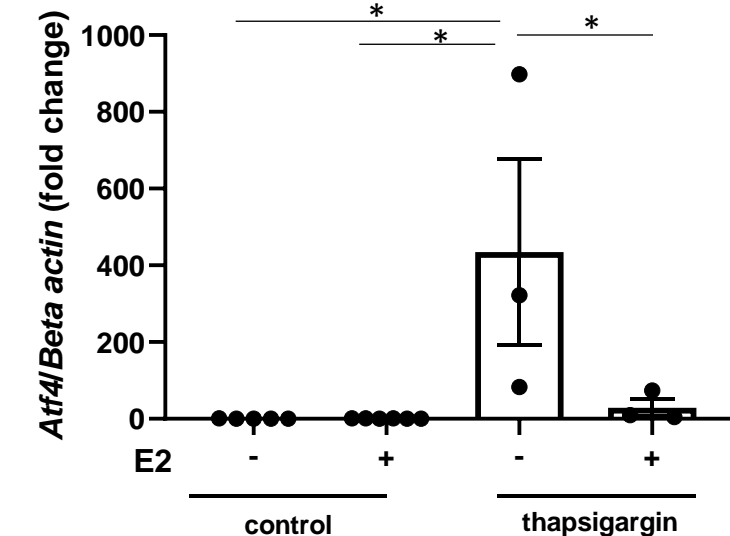

**Supplementary Figure S9. Expression of *Atf4* in BTC6 cells pretreated with estrogen.** Transcripts from BTC6 cells pretreated (or not) with 17-beta estradiol (E2) were analysed for the expression of the adaptive UPR marker *Atf4* after **(A)** 4 hours or **(B)** 8 hours of exposure to glucose (11 mM, 25 mM, 35 mM), tunicamycin (0.125 µg/ml), thapsigargin (0.25 µM). Mannitol (30 mM) was used as osmotic control. n=3-5 samples per experimental group, analyzed in duplicates. \*p<0.05, NS, not significant. Bars represent standard error of the mean (SEM).



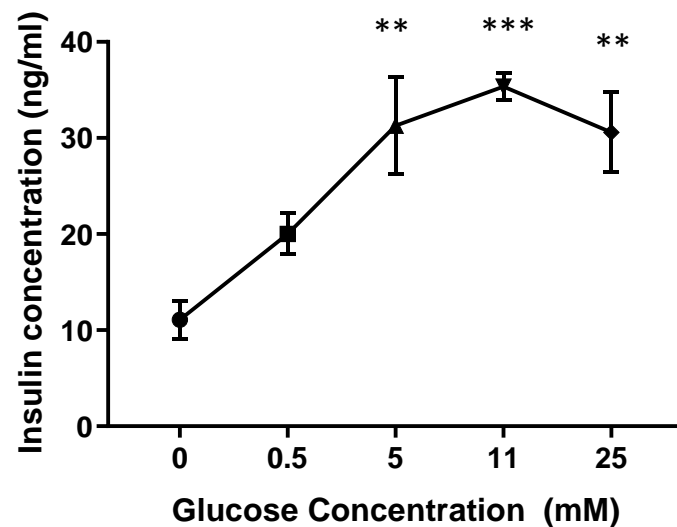

**Supplementary Figure S10. Glucose-stimulated insulin secretion in BTC6 cells.** BTC6 cells were exposed for two hours to Krebs-Ringer HEPES buffer containing increasing concentrations of glucose (0-25 mM). Cell medium was collected, and an enzyme-linked immunosorbent assay (ELISA) was performed to determine insulin concentration (Ultra Sensitive Mouse Insulin ELISA kit, 90080, Crystal Chem, Downers Grove, Illinois, USA). n=4 samples per experimental group, analyzed in duplicate. \*\*p<0.01 vs 0 mM glucose; \*\*\*p<0.001 vs 0 mM glucose. Bars represent standard error of the mean (SEM).

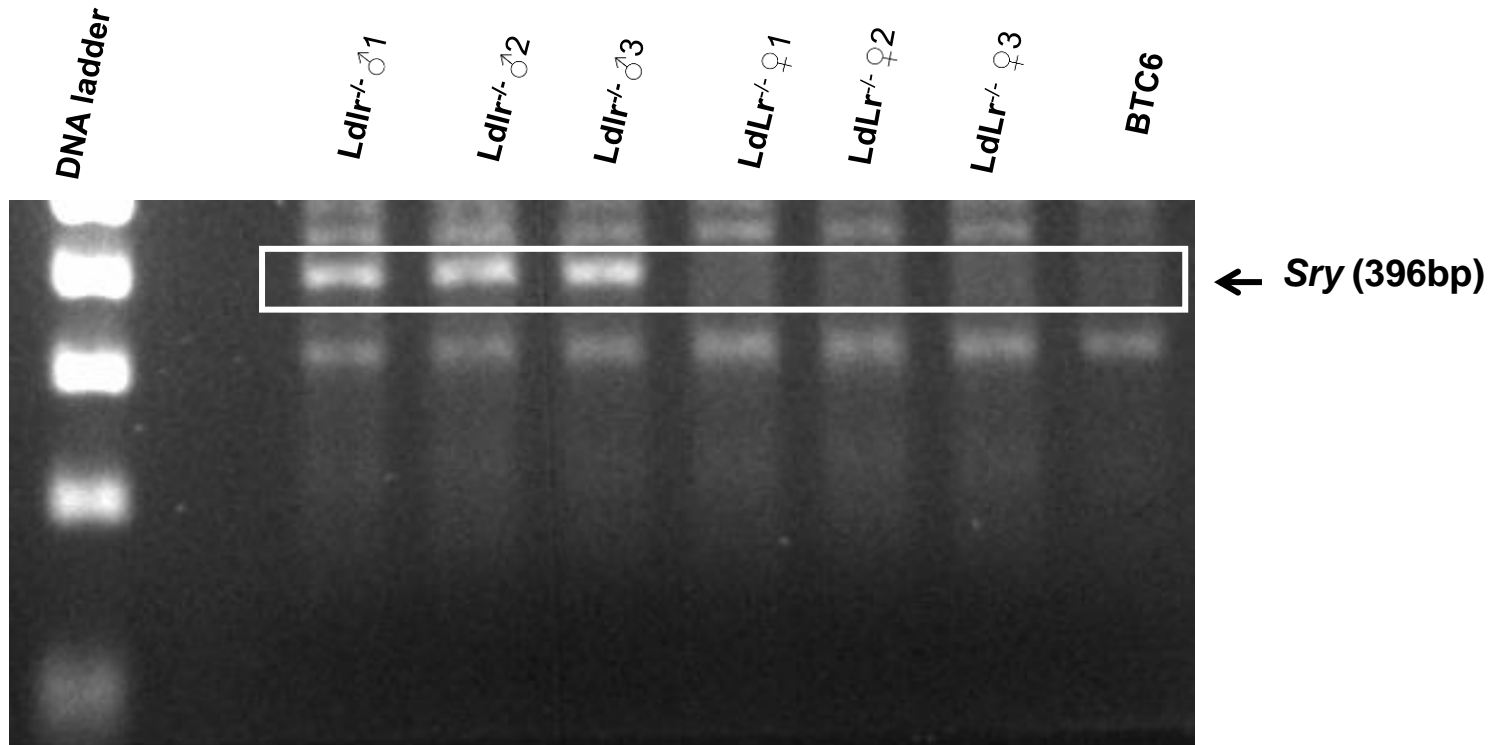

**Supplementary Figure S11. Sex-identification of *Ldlr*<sup>-/-</sup> mice and mouse cell line by PCR with mouse *Sry* primers.** *Sry* primers were designed based on mouse *Sry* locus, 8276-8295 and 8677 - 8658.. Mouse tails from *Ldlr*<sup>-/-</sup> mice or TC6 cell line were digested with 1 x tail lysis buffer and 2μl of DNA sample for each reaction was used.

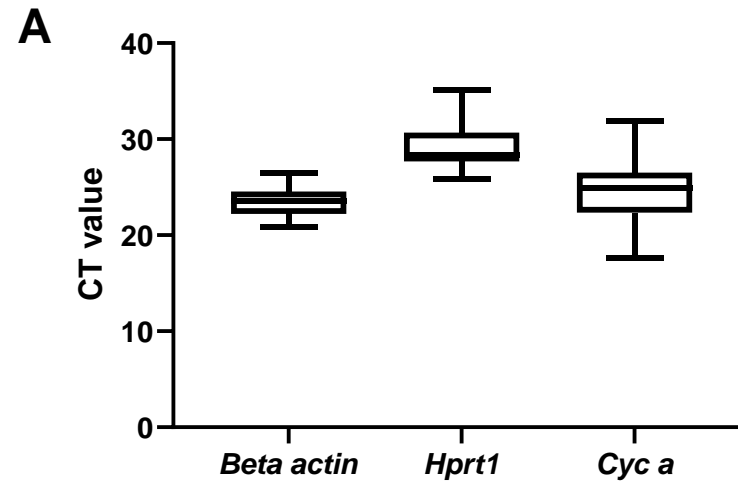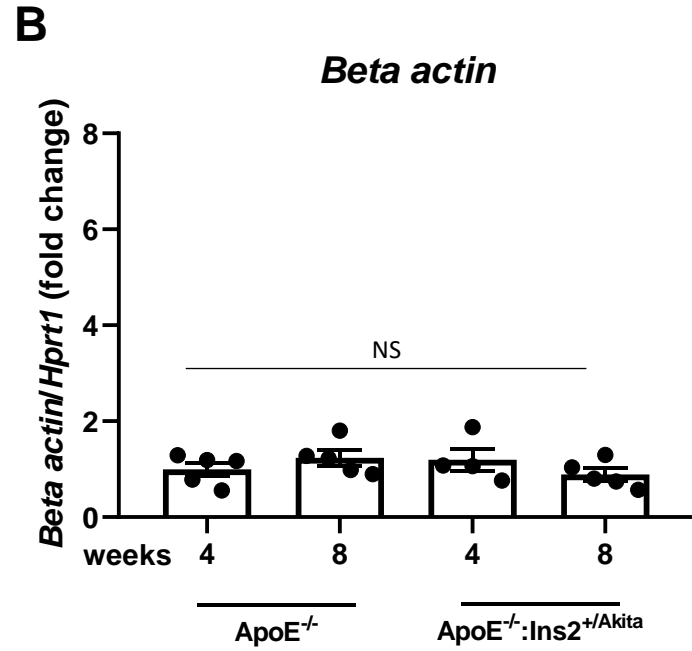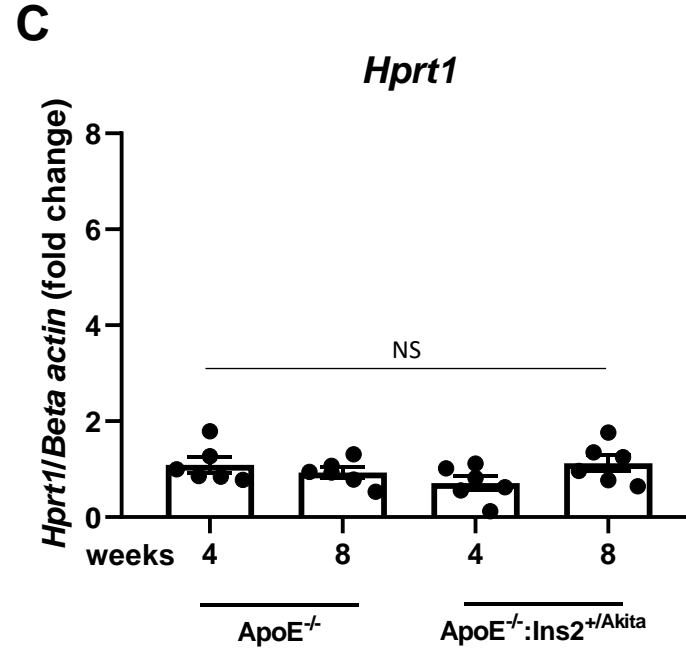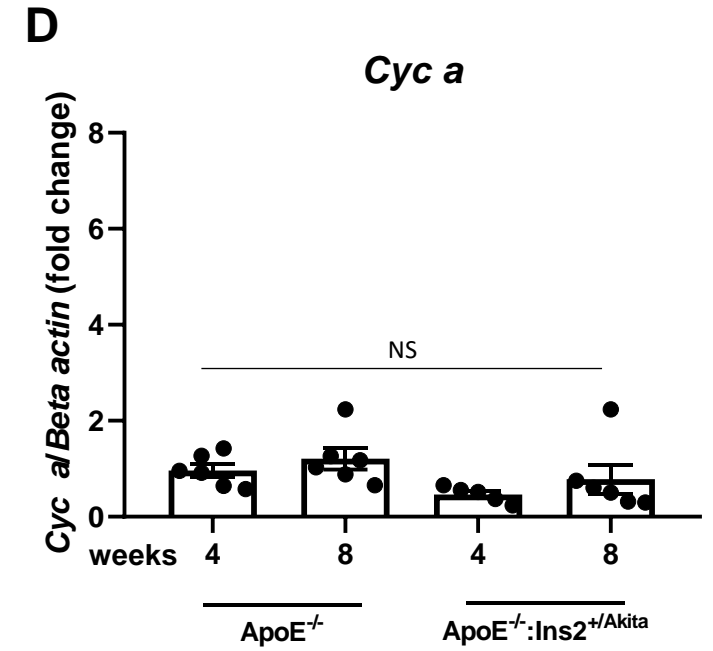

**Supplementary Figure S12. Validation of reference genes (*Beta actin*, *Cyclophilin a*, *Hprt1*) in isolated pancreatic islets.** Average CT values of pooled samples of isolated pancreatic islets from male and female ApoE<sup>-/-</sup> and ApoE<sup>-/-</sup>:Ins2<sup>+/Akita</sup> mice at 4 and 8 weeks of age for reference genes *Beta actin*, *Cyclophilin a*, and *Hprt1*. Boxes represent maximum and minimum values. Whiskers represent Standard Deviation. n=4-6 per experimental group. **(A)** Average CT values of *Beta actin*, *Cyclophilin a*, and *Hprt1* in all samples. Fold expression change of pooled samples of isolated pancreatic islets from male and female ApoE<sup>-/-</sup> and ApoE<sup>-/-</sup>:Ins2<sup>+/Akita</sup> mice at 4 and 8 weeks of age for reference genes **(B)** *Beta actin*, **(C)** *Cyclophilin a*, and **(D)** *Hrp1*. Bars represent standard error of the mean (SEM). n=4-6 per experimental group, analyzed in duplicates.

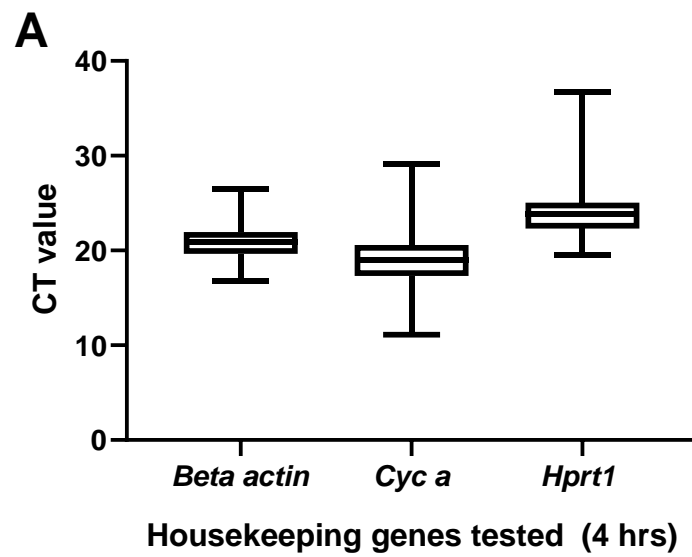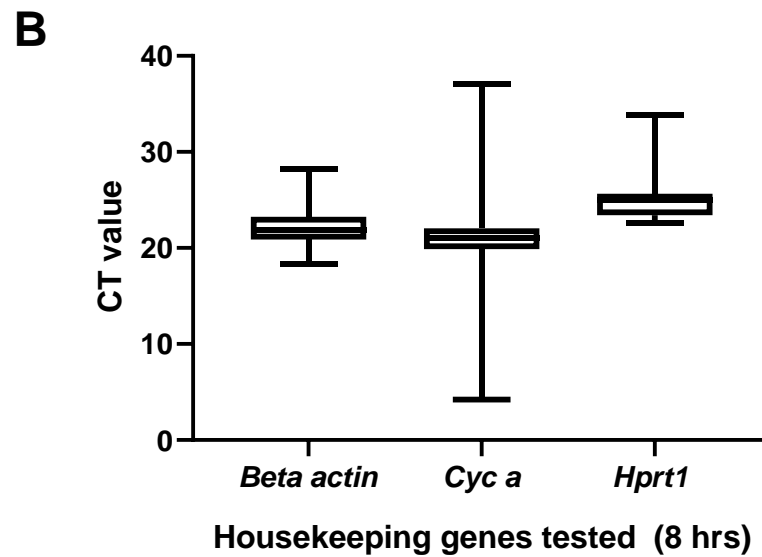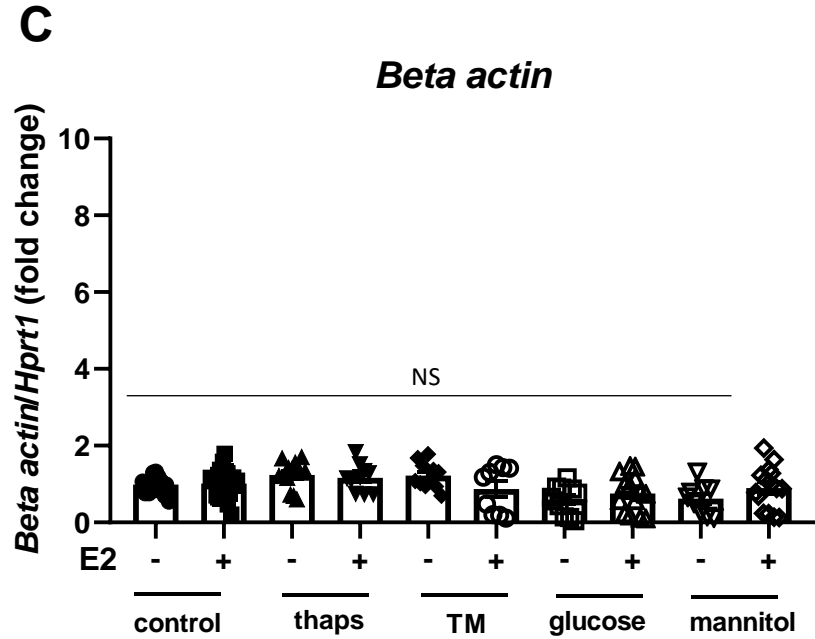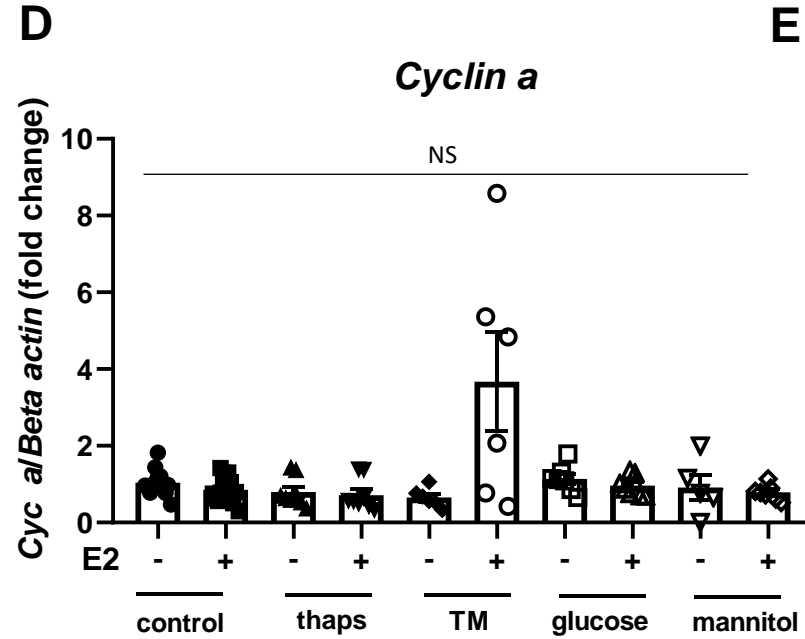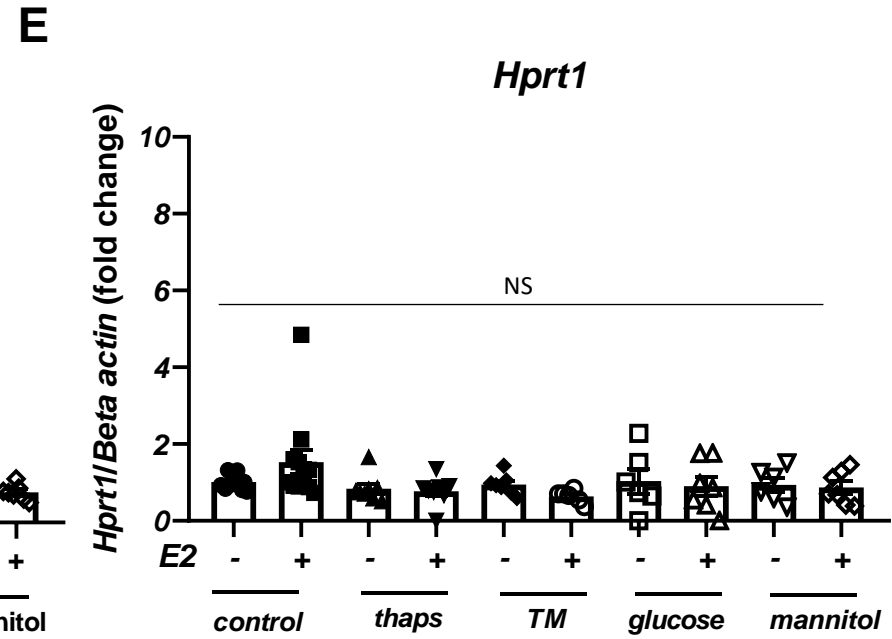



**Supplementary Figure S13. Validation of reference genes (*Beta actin*, *Cyclophilin a*, *Hprt1*) in BTC6 cells.** Average CT values for reference genes *Beta actin*, *Cyclophilin a*, and *Hprt1* of pooled BTC6 cells pretreated (or not) with 17-beta estradiol and exposed to glucose (11 mM, 25 mM, 35 mM), mannitol (30 mM), tunicamycin (0.125 µg/ml), thapsigargin (0.25 µM) for 4 or 8 hours. Boxes represent maximum and minimum values. Whiskers represent Standard Deviation. n=8-12 per experimental group, analyzed in duplicates. **(A)** Average CT values of *Beta actin*, *Cyclophilin A*, and *Hprt1* in all samples. Fold expression change of pooled samples of pooled BTC6 cells after 4 and 8 hours exposure to glucose (11 mM, 25 mM, 35 mM), mannitol (30 mM), tunicamycin (0.125 µg/ml), thapsigargin (0.25 µM). Reference genes **(B)** *Beta actin*, **(C)** *Cyclophilin a* , and **(D)** *Hrp1* were analyzed. Bars represent standard error of the mean (SEM). n=8-12 per experimental group, analyzed in duplicates.
